# Supplementary figures and images for: Topological description of a 3D self-catenated nickel hybrid vanadate Ni(bpe)(VO3)2. Thermal stability, spectroscopic and magnetic properties
Source: Royal Society of Chemistry journal article supplement (doi:10.1039/b800820e), 2008-01-01

## Supplementary Material

### S-1.

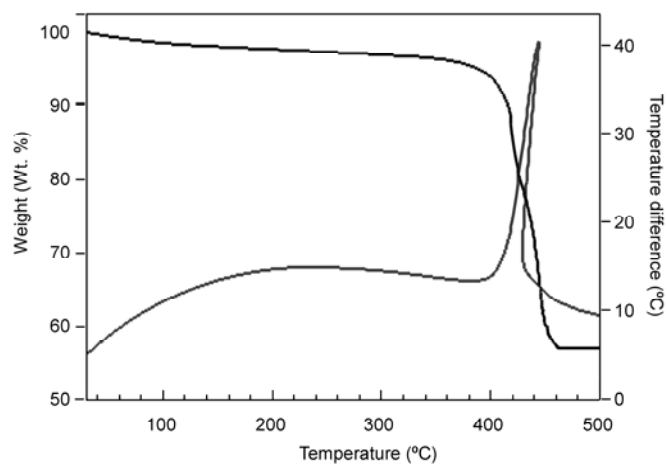

### S-2

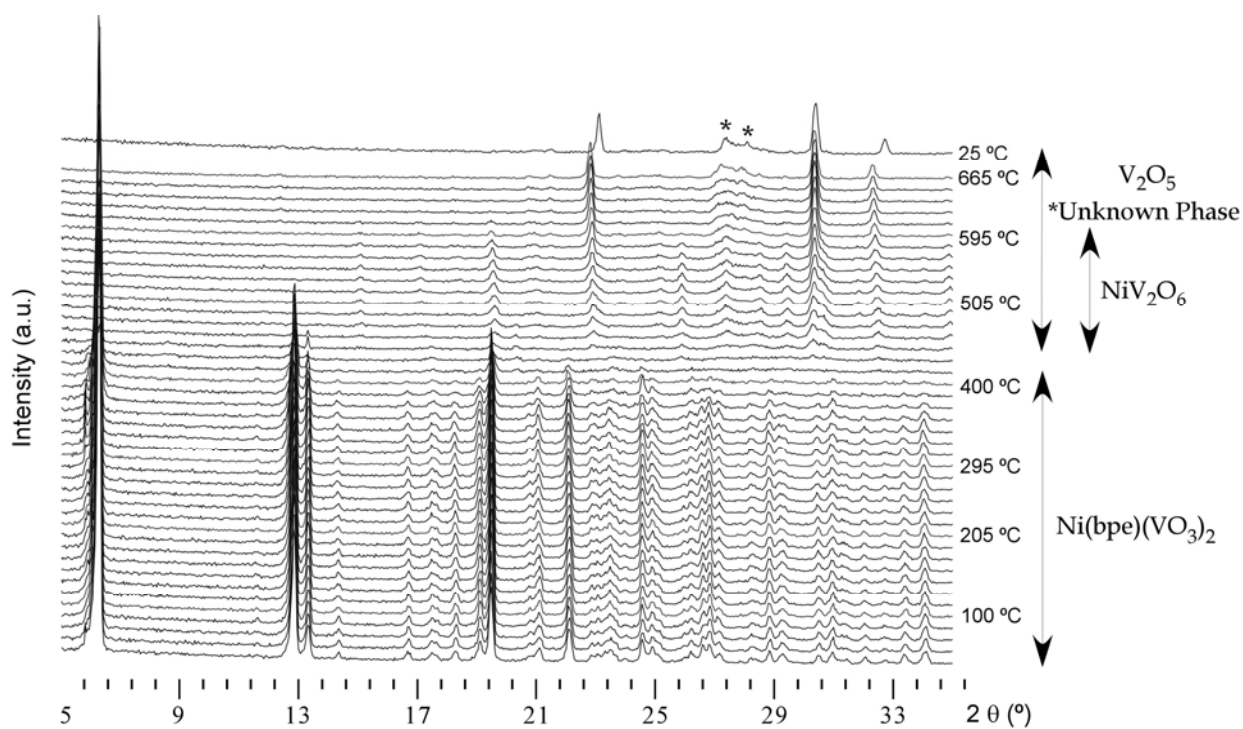

**S-3**

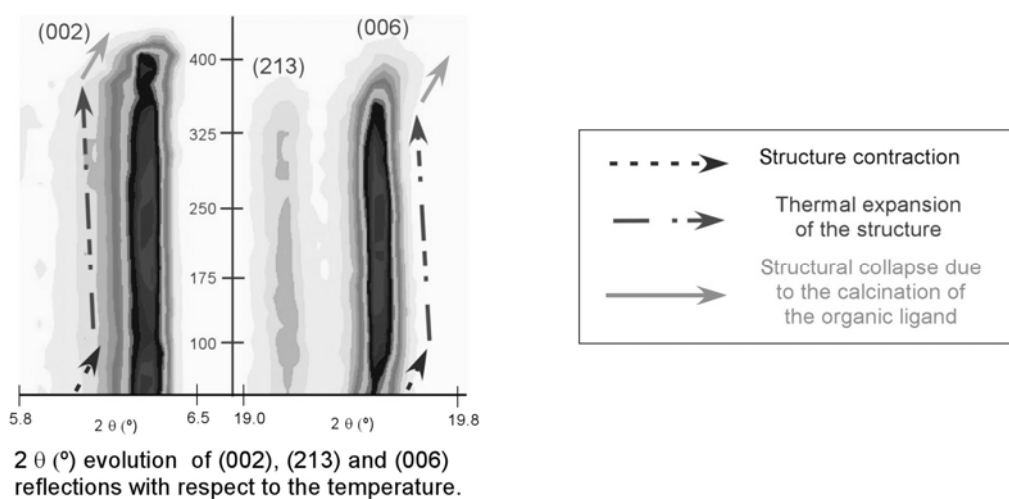

Supplement: b800820e.pdf [file b800820e.pdf]
